# Supplementary material for: Nanotransfection-based vasculogenic cell reprogramming drives functional recovery in a mouse model of ischemic stroke
Source: PubMed Central journal article supplement — Sci Adv. 2021 Mar 19;7(12):eabd4735. doi: 10.1126/sciadv.abd4735 (PMC7978431; doi:10.1126/sciadv.abd4735), 2021-03-19
Supplement: abd4735_SM.pdf [file abd4735_SM.pdf]

## Supplementary Materials for

### **Nanotransfection-based vasculogenic cell reprogramming drives functional recovery in a mouse model of ischemic stroke**

Luke R. Lemmerman, Maria H. H. Balch, Jordan T. Moore, Diego Alzate-Correa, Maria A. Rincon-Benavides, Ana Salazar-Puerta, Surya Gnyawali, Hallie N. Harris, William Lawrence, Lilibeth Ortega-Pineda, Lauren Wilch, Ian B. Risser, Aidan J. Maxwell, Silvia Duarte-Sanmiguel, Daniel Dodd, Gina P. Guio-Vega, Dana M. McTigue, W. David Arnold, Shahid M. Nimjee, Chandan K. Sen, Savita Khanna, Cameron Rink, Natalia Higueta-Castro\*, Daniel Gallego-Perez\*

\*Corresponding author. Email: gallegoperez.1@osu.edu (D.G.-P.); higitacastro.1@osu.edu (N.H.-C.)

Published 19 March 2021, *Sci. Adv.* 7, eabd4735 (2021)  
DOI: 10.1126/sciadv.abd4735

#### **This PDF file includes:**

Figs. S1 to S9  
Tables S1 to S5  
References

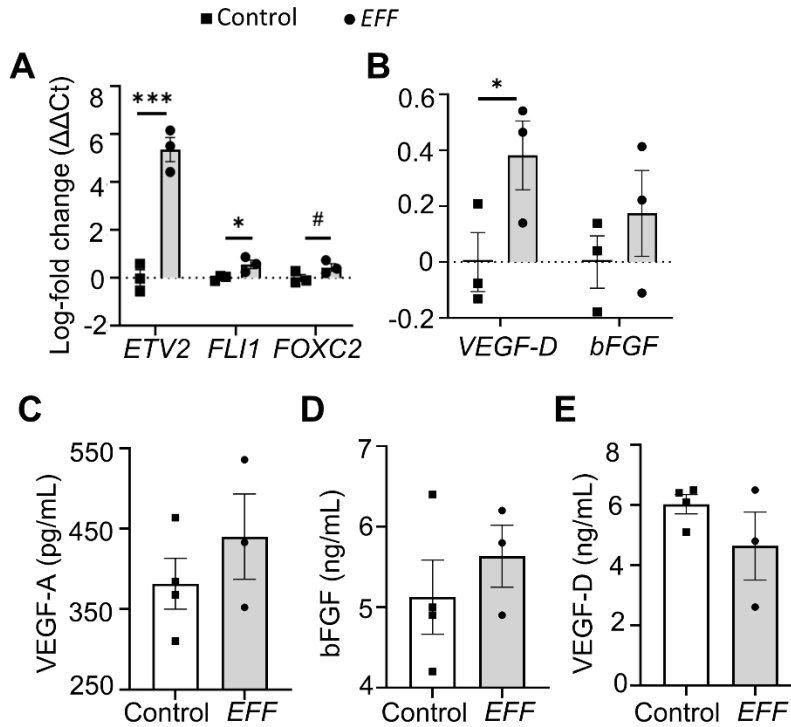

**Supplementary Figure 1. Gene and protein expression profile of fibroblast post nanotransfection with the *EFF* cocktail vs. sham/control fibroblasts.** qRT-PCR analysis of (A) *EFF* and (B) pro-lymphogenic/angiogenic factors in *EFF*-nanotransfected pMEFs at day 7 (n=3). The decrease in expression compared to day 1 readings is presumably due to the combined effect of iEC maturation, which may result in decreased expression of developmental transcription factors (20, 53), and additional *in vitro* proliferation of fibroblasts that did not reprogram. ELISA analysis of pro-angiogenic proteins, (C) VEGF-A and (D) bFGF and pro-lymphogenic protein, (E) VEGF-D in pMEFs 24 hours post-nanotransfection with *EFF* compared to control/sham plasmids (n=3-4). All error bars are shown as SE. # $p=0.054$ , \* $p<0.05$ , \*\*\* $p<0.001$  (One-tailed t-test).

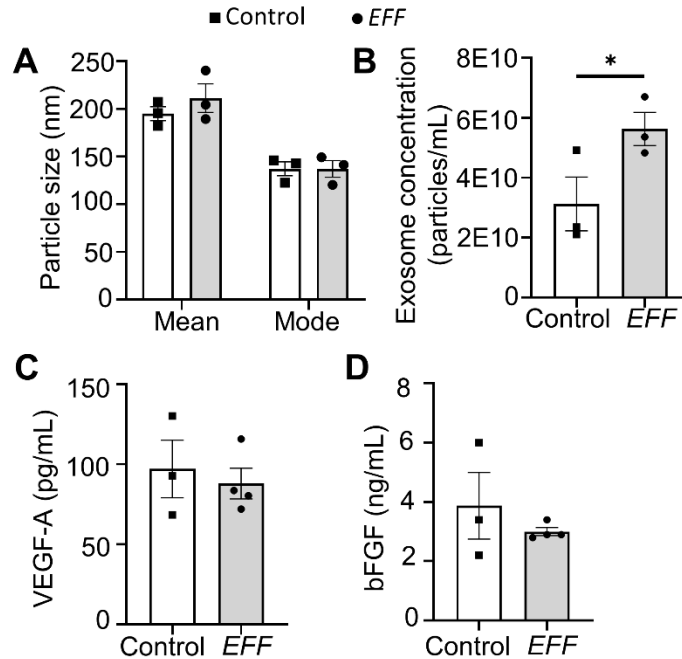

**Supplementary Figure 2. Size and protein cargo characterization of exosomes secreted from fibroblast nanotransfected with the *EFF* cocktail vs. sham/control plasmids.** (A) Size and (B) concentration profiles from exosomes collected from *EFF*-nanotransfected fibroblasts 24 hours post-nanotransfection compared to control (n=3). *EFF*-nanotransfected fibroblasts appeared to secrete more exosomes, but no significant changes in size were noted. ELISA analysis of pro-angiogenic proteins, (C) VEGF-A and (D) bFGF in exosomes collected from *EFF*-nanotransfected pMEFs 24 hours post-nanotransfection compared to control (n=3-4). No significant increase/trend was detected at the protein level. All error bars are shown as SE. \* $p < 0.05$  (One-tailed t-test).

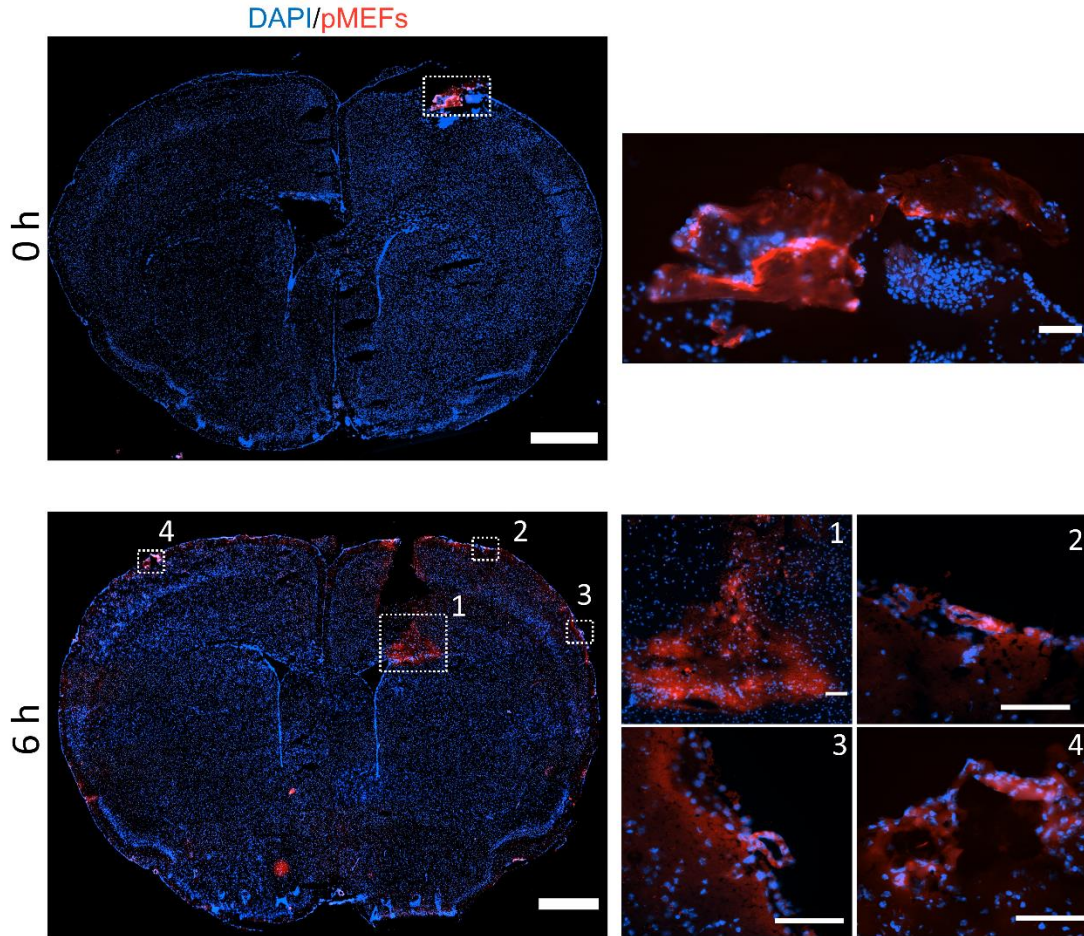

**Supplementary Figure 3. Fibroblast location 0 and 6 hours after intracranial delivery in healthy mice.** Fibroblasts were labelled with PKH26 (cell membrane marker; Sigma, ref. no. MKCK7206) immediately prior to intracranial delivery into the subarachnoid space in healthy mice. Representative fluorescence micrographs showing nuclear (DAPI) and labelled fibroblasts (PKH26) (A) immediately and (B) 6 hours post intracranial injection in healthy mice (scale bar = 1 mm for both whole brain images and 100  $\mu$ m for all insets). These data indicate that after a few hours, the injected fibroblasts are prone to spreading along the cortex, crossing into the contralateral hemisphere, possibly aided by cerebrospinal fluid flow (24, 25).

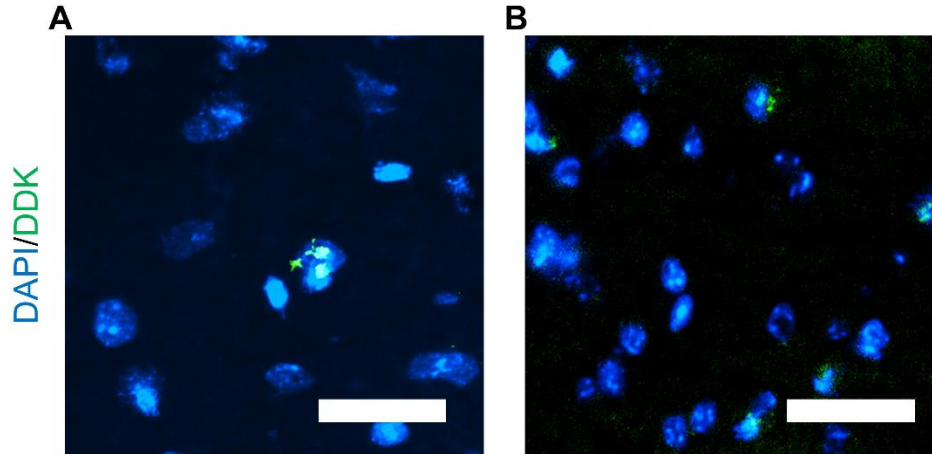

**Supplementary Figure 4. Positive DDK immunostaining is suggestive of the presence of *EFF*-nanotransfected/expressing fibroblasts in the contralateral hemisphere at days 7 and 14 post-injection.** Histological analysis for the DDK tag (green) on the *EFF* factors suggests that *EFF*-nanotransfected pMEFs can cross to the contralateral hemisphere following injection. This was verified in (A) brains that were not subjected to a stroke lesion (t = 7 days post-injection), as well as (B) brains that were subjected to a stroke lesion (t = 14 days post-injection) (scale bar = 25  $\mu$ m).

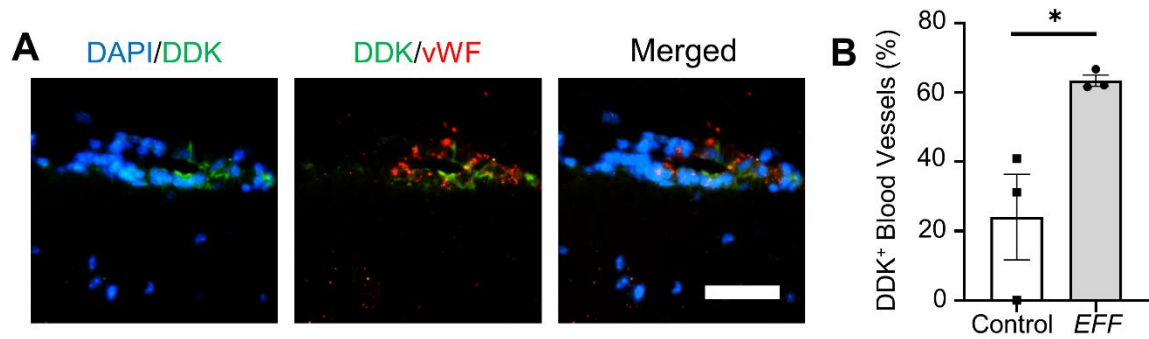

**Supplementary Figure 5. *EFF*-nanotransfected fibroblasts observed to co-localize with brain vasculature after intracranial injection.** (A) Fluorescence micrographs in the stroke-affected/ipsilateral hemisphere near the injection site 21 days post-stroke (*i.e.*, 14 days post-cell injection). The micrographs show cells that were immunoreactive for both the *EFF* tag (*i.e.*, DDK) and the endothelial cell marker vWF, presumably confirming the presence of *EFF*-nanotransfected pMEFs that converted into iECs, and that form integral/structural part of the newly developed iVas; (scale bar = 50  $\mu$ m). (B) Quantification of DDK+ blood vessels near intracranial injection site (n=3). Notably, although significantly less than *EFF*-nanotransfected fibroblasts, some sham-nanotransfected fibroblasts also appear to be closely associated with vWF+ structures. This observation could potentially be indicative of vWF+ fibroblasts, which have been reported in previous studies when co-cultured in close proximity with endothelial cells (54), and/or simple physical proximity between the injected cells and pre-existing vasculature. All error bars are shown as SE. \* $p < 0.05$  (One-tailed t-test).

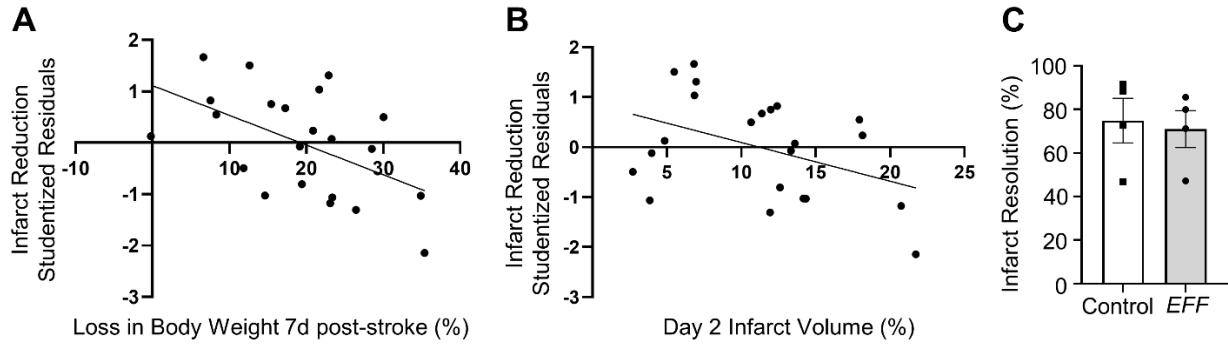

**Supplementary Figure 6. Loss in body weight and day 2 infarct volume significantly impact infarct resolution.** Linear regression analysis for infarct volume reduction confounding variables: **(A)** loss in body weight 7 days post-stroke ( $R^2 = 0.268$ ,  $adj. R^2 = 0.231$ ,  $p\text{-value} = 0.014$ ,  $n=22$ ) and **(B)** day-2 infarct volume ( $R^2 = 0.174$ ,  $adj. R^2 = 0.174$ ,  $p\text{-value} = 0.054$ ,  $n=22$ ). **(C)** Percent stroke volume reduction in mice with <17% loss in body weight 7 days post-stroke ( $n=4$ ). All error bars are shown as SE.

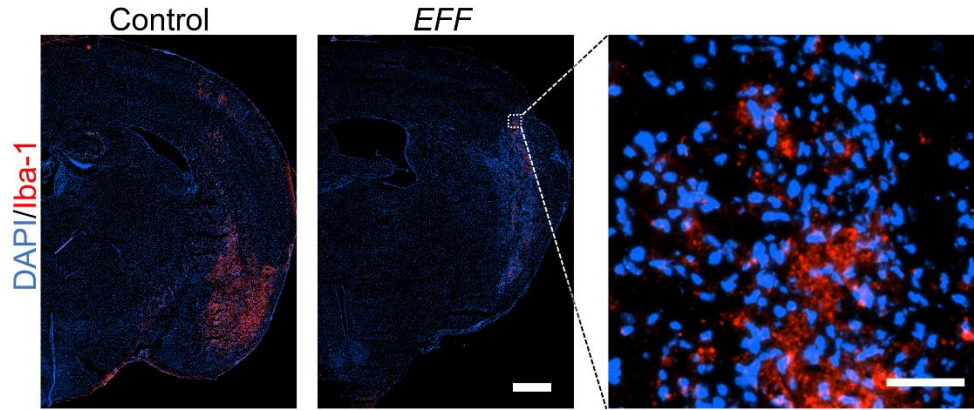

**Supplementary Figure 7. Microglia presence in glial scar for mice treated with sham- and *EFF*-nanotransfected fibroblasts.** Immunofluorescence micrographs of the ipsilateral hemisphere showing nuclear (DAPI) and microglia (Iba-1) staining 21 days post-stroke in mice treated with sham- or *EFF*-nanotransfected cells (scale bar = 750  $\mu\text{m}$ ) with representative higher magnification inset (scale bar = 50  $\mu\text{m}$ ).



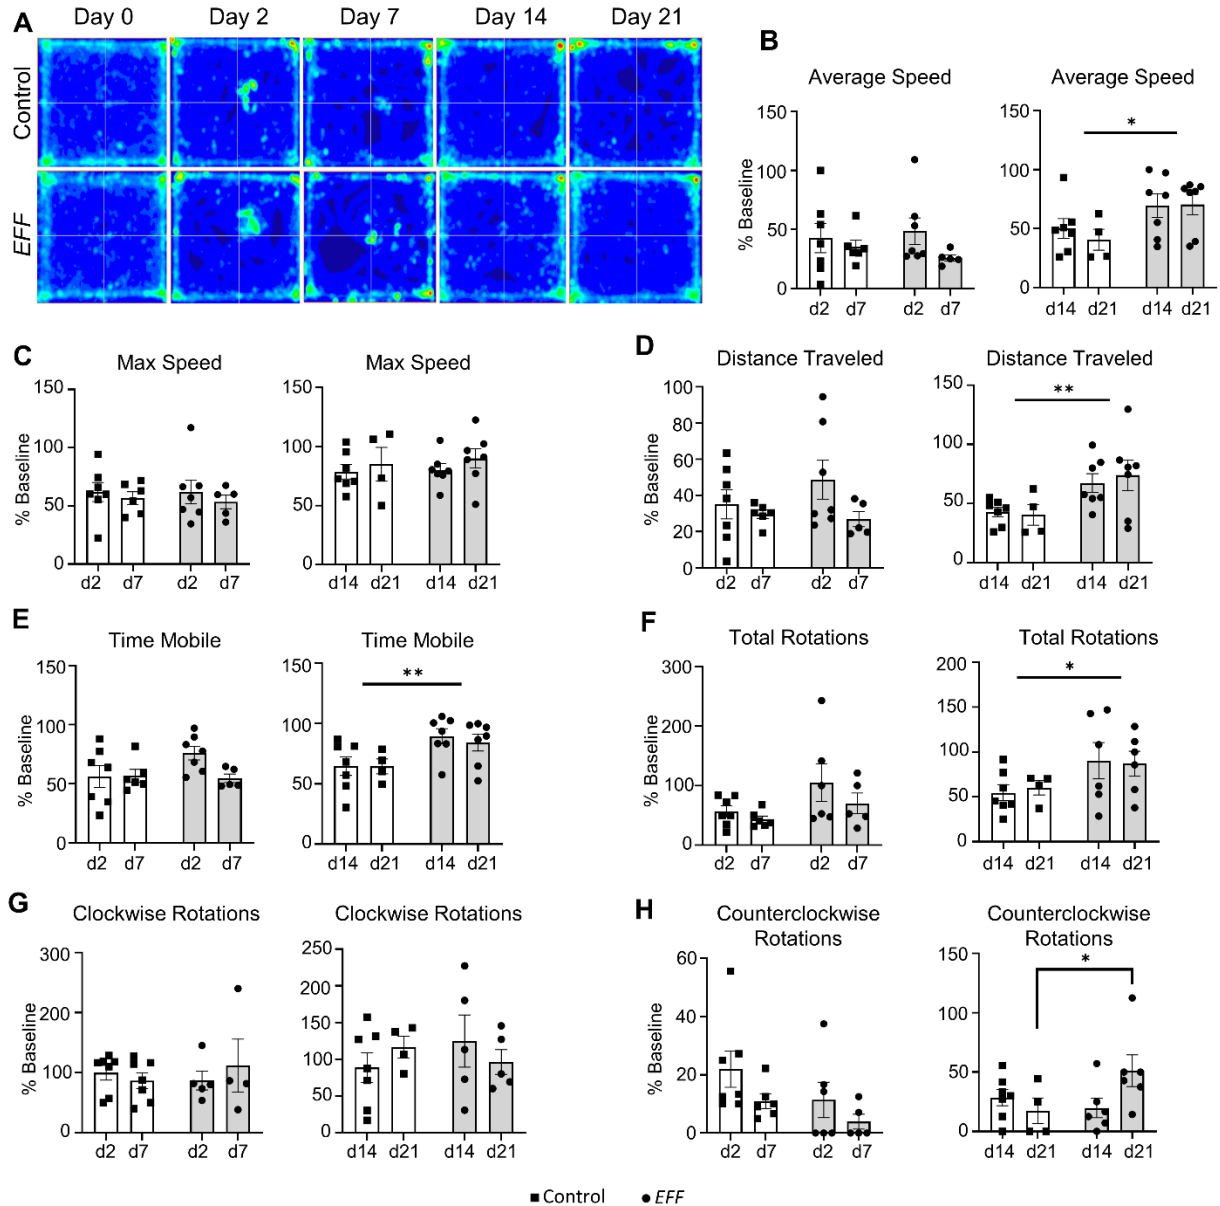

**Supplementary Figure 8. Quantified parameters from open-field behavioral assessments throughout experimental timeline.** (A) Occupancy heat maps depicting mice activity per location during behavioral testing on days 0, 2, 7, 14 and 21 post-stroke (dark blue – low activity area, red – high activity area). Individual behavioral parameter quantification (*left*) before and (*right*) after sham- or *EFF*-nanotransfected cell injection for (B) average speed, (C) maximum speed, (D) distance traveled, (E) time mobile, (F) total rotations, (G) clockwise rotations and (H)

counterclockwise rotations (n=4-7). All error bars are shown as SE.  $*p<0.05$ ,  $**p<0.01$ ,  $***p<0.001$  (two-way ANOVA)

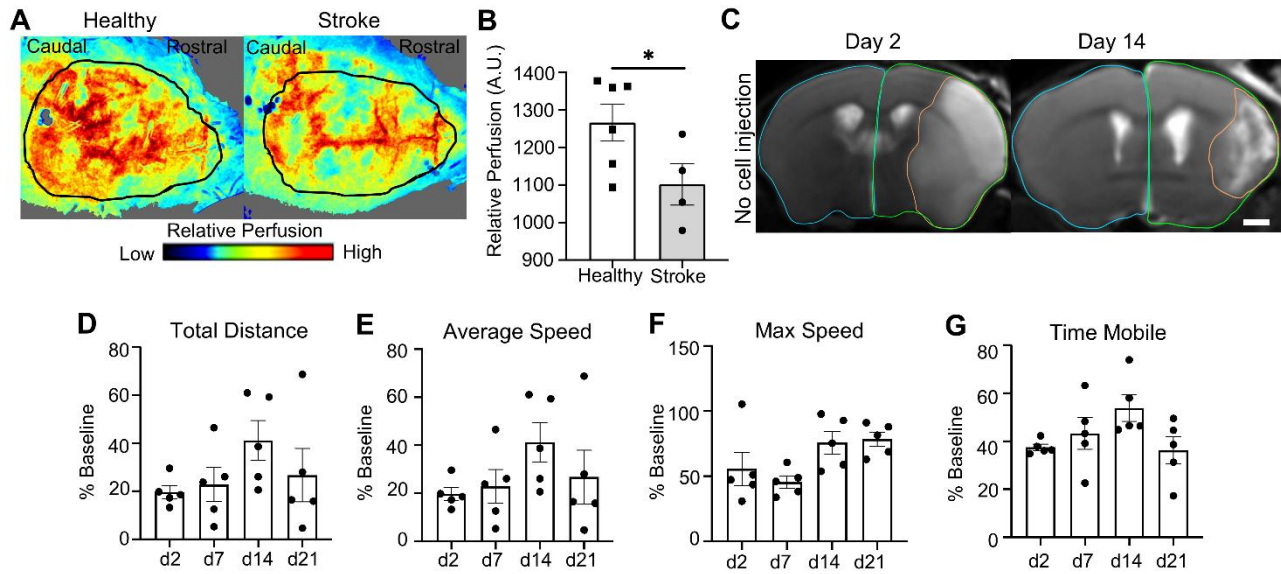

**Supplementary Figure 9. Brain perfusion, infarct resolution and behavioral assessment in stroke-affected mice with no cell injection.** A separate cohort of mice underwent the MCAO procedure without receiving the intracranial cell injection (*i.e.*, stroke only) to provide a reference group. **(A-B)** Brain perfusion in healthy mice or stroke only (21 days post-MCAO) with representative tracings for perfusion assessment ( $n=4-6$ ). **(C)** T2-weighted MR images 2 days and 14 days post-stroke with representative tracings for assessment of infarct volume (orange) and hemisphere volumes (green/blue); (scale bar=1mm). Infarct resolution analysis for stroke only mice demonstrated a similar mean resolution of 49 percent ( $SE=7.9$ ) from day 2 to day 14 post-stroke in stroke only mice ( $n=5$ ) compared to mice intracranially injected with sham-nanotransfected pMEFs 7 days post-MCAO (mean resolution=47 percent,  $SE=8.8$ ,  $n=7$ ). Individual behavioral parameters were collected and quantified at pre-MCAO (baseline/day 0) and post-MCAO (days 2, 7, 14 and 21) for **(D)** distance traveled, **(E)** average speed, **(C)** maximum speed, **(D)** time mobile ( $n=5$ ). Stroke only mice and mice treated with sham-nanotransfected pMEFs 7 days post-MCAO produced similar recovery trends with no/minimal marked increase in

distance travelled, average speed or time mobile parameters. All error bars are shown as SE.

\* $p < 0.05$  (One-tailed t-test)

**Supplementary Table 1.** Full list of plasmid DNA vectors used in the study.

| Plasmid vector                                   | Company | Ref. Number | Type                   | Tag     | Vector      |
|--------------------------------------------------|---------|-------------|------------------------|---------|-------------|
| pCMV6-Entry Tagged Cloning Vector (sham/control) | Origene | PS100001    | N/A                    | Myc-DDK | pCMV6-Entry |
| Fli1 - Mouse friend leukemia integraion          | Origene | MR225907    | Mouse Tagged ORF Clone | Myc-DDK | pCMV6-Entry |
| ETV2 - Mouse ets variant gene 2                  | Origene | MR216258    | Mouse Tagged ORF Clone | Myc-DDK | pCMV6-Entry |
| FoxC2 - Mouse forkhead box C2                    | Origene | MR221977    | Mouse Tagged ORF Clone | Myc-DDK | pCMV6-Entry |

**Supplementary Table 2.** Full list of primers used in the gene expression analysis in the study.

| Gene Symbol | Gene Name                                | Gene Aliases               | Species | Company                 | Ref. no.      |
|-------------|------------------------------------------|----------------------------|---------|-------------------------|---------------|
| Gapdh       | glyceraldehyde-3-phosphate dehydrogenase | Gapd                       | Mouse   | ThermoFisher Scientific | Mm99999915_g1 |
| Etv2        | ets variant 2                            | Etsrp71                    | Mouse   | ThermoFisher Scientific | Mm00468389_m1 |
| Fli1        | Friend leukemia integration 1            | EWSR2, Fli-1, SIC-1, Sic1  | Mouse   | ThermoFisher Scientific | Mm00484410_m1 |
| Foxc2       | forkhead box C2                          | Fkh14, Hfhbf3, MFH-1, Mfh1 | Mouse   | ThermoFisher Scientific | Mm00546194_s1 |
| Figf        | c-fos induced growth factor              | AI325264, VEGF-D, Vegfd    | Mouse   | ThermoFisher Scientific | Mm01131929_m1 |
| Fgf2        | fibroblast growth factor 2               | Fgf-2, Fgfb, bFGF          | Mouse   | ThermoFisher Scientific | Mm00433287_m1 |

**Supplementary Table 3.** Full list of immunohistology antibodies/proteins used in the study.

| Target            | Primary Antibody/Protein | Raised in | Company      | ref. no. | Conc.  | Secondary Antibody/Fluorofore         | Conc. |
|-------------------|--------------------------|-----------|--------------|----------|--------|---------------------------------------|-------|
| Mature Neurons    | NeuN                     | Rabbit    | Abcam        | ab177487 | 1:500  | Goat $\alpha$ -rabbit IgG (H+L) (568) | 1:200 |
| Astroglia         | GFAP                     | Rabbit    | Abcam        | ab7260   | 1:500  | Goat $\alpha$ -rabbit IgG (H+L) (568) | 1:200 |
| Microglia         | Iba1                     | Rabbit    | Abcam        | ab178846 | 1:500  | Goat $\alpha$ -rabbit IgG (H+L) (568) | 1:200 |
| Endothelial cells | vWF                      | Rabbit    | Abcam        | ab6994   | 1:1000 | Goat $\alpha$ -rabbit IgG (H+L) (568) | 1:200 |
| Endothelial cells | CD31                     | Rat       | BD Pharmigen | 550274   | 1:50   | Goat $\alpha$ -rat IgG (H+L) (488)    | 1:200 |
| Endothelial cells | RCA I (Lectin)           | N/A       | Vector       | FL-1081  | 1:20   | Fluorescein (conjugated w/ RCA I)     | N/A   |
| Plasmid tag       | DDK                      | Mouse     | Origene      | TA50011  | 1:500  | Goat $\alpha$ -mouse IgG (H+L) (488)  | 1:200 |

**Supplementary Table 4.** Full list of one-tailed t-test results.

| Data                                                   | Statistical Test            | Sham n | EFF n | Shapiro-Wilk Normality Test | Brown-Forsythe Equal Variance Test | T Statistic | p-value | DOF    |
|--------------------------------------------------------|-----------------------------|--------|-------|-----------------------------|------------------------------------|-------------|---------|--------|
| <i>Etv2</i> gene expression (cells 1 day post-NEP)     | One-tailed Welch's t-test   | 3      | 3     | Passed                      | Failed                             | -15.947     | 0.001   | 2.269  |
| <i>Fli1</i> gene expression (cells 1 day post-NEP)     | One-tailed Student's t-test | 3      | 3     | Passed                      | Passed                             | -42.855     | <0.001  | 4.000  |
| <i>FoxC2</i> gene expression (cells 1 day post-NEP)    | One-tailed Student's t-test | 3      | 3     | Passed                      | Passed                             | -81.768     | <0.001  | 4.000  |
| <i>VegfD</i> gene expression (cells 1 day post-NEP)    | One-tailed Welch's t-test   | 3      | 3     | Passed                      | Failed                             | -4.589      | 0.021   | 2.037  |
| <i>bFGF</i> gene expression (cells 1 day post-NEP)     | One-tailed Student's t-test | 3      | 3     | Passed                      | Passed                             | -2.442      | 0.036   | 4.000  |
| <i>Etv2</i> gene expression (cells 7 day post-NEP)     | One-tailed Student's t-test | 3      | 3     | Passed                      | Passed                             | -8.841      | <0.001  | 4.000  |
| <i>Fli1</i> gene expression (cells 7 day post-NEP)     | One-tailed Student's t-test | 3      | 3     | Passed                      | Passed                             | -2.978      | 0.020   | 4.000  |
| <i>FoxC2</i> gene expression (cells 7 day post-NEP)    | One-tailed Student's t-test | 3      | 3     | Passed                      | Passed                             | -2.061      | 0.054   | 4.000  |
| <i>VegfD</i> gene expression (cells 7 day post-NEP)    | One-tailed Student's t-test | 3      | 3     | Passed                      | Passed                             | -2.356      | 0.039   | 4.000  |
| <i>bFGF</i> gene expression (cells 7 day post-NEP)     | One-tailed Student's t-test | 3      | 3     | Passed                      | Passed                             | -0.972      | 0.193   | 4.000  |
| <i>Etv2</i> gene expression (Exosomes 1 day post-NEP)  | One-tailed Student's t-test | 6      | 3     | Passed                      | Passed                             | -10.327     | <0.001  | 7.000  |
| <i>Fli1</i> gene expression (Exosomes 1 day post-NEP)  | One-tailed Student's t-test | 6      | 3     | Passed                      | Passed                             | -12.134     | <0.001  | 7.000  |
| <i>FoxC2</i> gene expression (Exosomes 1 day post-NEP) | One-tailed Student's t-test | 6      | 3     | Passed                      | Passed                             | -12.988     | <0.001  | 7.000  |
| <i>VegfD</i> gene expression (Exosomes 1 day post-NEP) | One-tailed Student's t-test | 6      | 6     | Passed                      | Passed                             | -0.727      | 0.242   | 10.000 |
| <i>bFGF</i> gene expression (Exosomes 1 day post-NEP)  | One-tailed Student's t-test | 6      | 6     | Passed                      | Passed                             | -1.450      | 0.089   | 10.000 |
| Infarct Volume Resolution - all mice                   | One-tailed Student's t-test | 11     | 11    | Passed                      | Passed                             | -1.238      | 0.115   | 20.000 |
| Infarct Volume Resolution - mice >17%BW loss           | One-tailed Student's t-test | 7      | 7     | Passed                      | Passed                             | 1.796       | 0.049   | 12.000 |
| Infarct Volume Resolution - mice <17%BW loss           | One-tailed Student's t-test | 4      | 4     | Passed                      | Passed                             | -0.291      | 0.390   | 6.000  |
| CD31 Immunohistology - Ipsilateral hemisphere          | One-tailed Student's t-test | 6      | 8     | Passed                      | Passed                             | -2.726      | 0.009   | 12.000 |
| CD31 Immunohistology - Contralateral hemisphere        | One-tailed Student's t-test | 6      | 8     | Passed                      | Passed                             | -2.275      | 0.021   | 12.000 |
| Lectin immunohistology - Ipsilateral hemisphere        | One-tailed Welch's t-test   | 4      | 7     | Passed                      | Failed                             | -3.979      | 0.002   | 8.369  |
| Lectin Immunohistology - Contralateral hemisphere      | One-tailed Student's t-test | 4      | 7     | Passed                      | Passed                             | -2.725      | 0.012   | 9.000  |

|                                                     |                             |      |      |        |        |        |       |        |
|-----------------------------------------------------|-----------------------------|------|------|--------|--------|--------|-------|--------|
| NeuN Immunohistology - Ipsilateral hemisphere       | One-tailed Student's t-test | 8    | 9    | Passed | Passed | -2.818 | 0.006 | 15.000 |
| GFAP Immunohistology - Ipsilateral hemisphere       | One-tailed Student's t-test | 10   | 10   | Passed | Passed | -2.373 | 0.015 | 18.000 |
| DDK/vWF Immunohistology - Ipsilateral hemisphere    | One-tailed Student's t-test | 3    | 3    | Passed | Passed | -3.162 | 0.017 | 4.000  |
| Exosome mean particle size                          | One-tailed Student's t-test | 3    | 3    | Passed | Passed | 0.971  | 0.193 | 4.000  |
| Exosome mode particle size                          | One-tailed Student's t-test | 3    | 3    | Passed | Passed | -0.018 | 0.493 | 4.000  |
| Exosome concentration                               | One-tailed Student's t-test | 3    | 3    | Passed | Passed | 2.367  | 0.039 | 4.000  |
| LSI - Healthy CI                                    | One-tailed Student's t-test | 6    | 6    | Passed | Passed | -2.152 | 0.028 | 10.000 |
| VEGF-A protein expression (cells 1 day post-NEP)    | One-tailed Student's t-test | 4    | 3    | Passed | Passed | -1.009 | 0.180 | 5.000  |
| VEGF-D protein expression (cells 1 day post-NEP)    | One-tailed Welch's t-test   | 4    | 3    | Passed | Failed | 1.186  | 0.171 | 2.324  |
| bFGF protein expression (cells 1 day post-NEP)      | One-tailed Student's t-test | 4    | 3    | Passed | Passed | -0.803 | 0.229 | 5.000  |
| VEGF-A protein expression (exosomes 1 day post-NEP) | One-tailed Student's t-test | 3    | 4    | Passed | Passed | 0.485  | 0.324 | 5.000  |
| bFGF protein expression (exosomes 1 day post-NEP)   | One-tailed Welch's t-test   | 3    | 4    | Passed | Failed | 0.767  | 0.261 | 2.058  |
| LSI - Healthy(H) /stroke(S) only                    | One-tailed Student's t-test | (H)6 | (S)4 | Passed | Passed | 2.183  | 0.030 | 8.000  |

**Supplementary Table 5.** Full list of two-way ANOVA results.

| Data                                                                                                                                        | Statistical Test       | Sham n       | EFF n        | Normality Test | Equal Variance Test | T: F statistic | T: p-value | D: F statistic | D: p-value    | TDI: F statistic | TDI: p-value |
|---------------------------------------------------------------------------------------------------------------------------------------------|------------------------|--------------|--------------|----------------|---------------------|----------------|------------|----------------|---------------|------------------|--------------|
| d14 and d21 Behavioral - Average Speed                                                                                                      | Two-way ANOVA          | d14=7; d21=4 | d14=7; d21=7 | Passed         | Passed              | 6.736          | 0.017      | 0.213          | 0.650         | 0.304            | 0.587        |
| d14 and d21 Behavioral - Max Speed                                                                                                          | Two-way ANOVA          | d14=7; d21=4 | d14=7; d21=7 | Passed         | Passed              | 0.158          | 0.695      | 0.984          | 0.333         | 0.046            | 0.832        |
| d14 and d21 Behavioral - Distance Traveled                                                                                                  | Two-way ANOVA          | d14=7; d21=4 | d14=7; d21=7 | Passed         | Passed              | 9.331          | 0.006      | 0.051          | 0.823         | 0.218            | 0.645        |
| d14 and d21 Behavioral - Time Mobile                                                                                                        | Two-way ANOVA on Ranks | d14=7; d21=4 | d14=7; d21=7 | Failed         | Passed              | 11.584         | 0.003      | 2.339          | 0.141         | 0.456            | 0.507        |
| d14 and d21 Behavioral - # of Total Rotations                                                                                               | Two-way ANOVA          | d14=7; d21=4 | d14=7; d21=6 | Passed         | Passed              | 4.638          | 0.044      | 0.007          | 0.935         | 0.094            | 0.762        |
| d14 and d21 Behavioral - # of Clockwise Rotations                                                                                           | Two-way ANOVA on Ranks | d14=7; d21=4 | d14=6; d21=5 | Passed         | Failed              | 0.033          | 0.859      | 1.138          | 0.301         | 1.190            | 0.290        |
| d14 and d21 Behavioral - # of Counterclockwise Rotations                                                                                    | Two-way ANOVA          | d14=7; d21=4 | d14=7; d21=6 | Passed         | Passed              | 1.507          | 0.235      | 0.986          | 0.333         | 4.413            | 0.049*       |
| d2 and d7 Behavioral - Average Speed                                                                                                        | Two-way ANOVA          | d2=7; d7=6   | d2=7; d7=5   | Passed         | Passed              | 0.028          | 0.869      | 2.260          | 0.148         | 0.559            | 0.463        |
| d2 and d7 Behavioral - Max Speed                                                                                                            | Two-way ANOVA          | d2=7; d7=6   | d2=7; d7=5   | Passed         | Passed              | 0.036          | 0.851      | 0.695          | 0.414         | 0.045            | 0.834        |
| d2 and d7 Behavioral - Distance Traveled                                                                                                    | Two-way ANOVA          | d2=7; d7=6   | d2=7; d7=5   | Passed         | Passed              | 0.463          | 0.504      | 2.952          | 0.100         | 1.062            | 0.314        |
| d2 and d7 Behavioral - Time Mobile                                                                                                          | Two-way ANOVA          | d2=7; d7=6   | d2=7; d7=5   | Passed         | Passed              | 1.628          | 0.216      | 2.315          | 0.143         | 2.562            | 0.124        |
| d2 and d7 Behavioral - # of Total Rotations                                                                                                 | Two-way ANOVA on Ranks | d2=7; d7=6   | d2=6; d7=5   | Failed         | Passed              | 2.497          | 0.130      | 0.452          | 0.509         | 0.009            | 0.927        |
| d2 and d7 Behavioral - # of Clockwise Rotations                                                                                             | Two-way ANOVA          | d2=7; d7=7   | d2=5; d7=4   | Passed         | Passed              | 0.090          | 0.768      | 0.085          | 0.774         | 0.901            | 0.354        |
| d2 and d7 Behavioral - # of Counterclockwise Rotations                                                                                      | Two-way ANOVA on Ranks | d2=7; d7=6   | d2=5; d7=5   | Failed         | Passed              | 2.030          | 0.170      | 0.135          | 0.717         | 0.357            | 0.557        |
| Legend: Treatment = T; Day = D; Treatment x Day Interaction = TDI; Normality Test = Shapiro-Wilk Test; Equal Variance = Brown-Forsythe Test |                        |              |              |                |                     |                |            | *              | Interaction   | T-statistic      | p-value      |
|                                                                                                                                             |                        |              |              |                |                     |                |            |                | Treatmentxd21 | 2.197            | 0.041        |



## REFERENCES AND NOTES

1. W. Johnson, O. Onuma, M. Owolabi, S. Sachdev, Stroke: A global response is needed. *Bull. World Health Organ.* **94**, 634 (2016).
2. S. S. Virani, A. Alonso, E. J. Benjamin, M. S. Bittencourt, C. W. Callaway, A. P. Carson, A. M. Chamberlain, A. R. Chang, S. Cheng, F. N. Delling, L. Djousse, M. S. V. Elkind, J. F. Ferguson, M. Fornage, S. S. Khan, B. M. Kissela, K. L. Knutson, T. W. Kwan, D. T. Lackland, T. T. Lewis, J. H. Lichtman, C. T. Longenecker, M. S. Loop, P. L. Lutsey, S. S. Martin, K. Matsushita, A. E. Moran, M. E. Mussolino, A. M. Perak, W. D. Rosamond, G. A. Roth, U. K. A. Sampson, G. M. Satou, E. B. Schroeder, S. H. Shah, C. M. Shay, N. L. Spartano, A. Stokes, D. L. Tirschwell, L. B. VanWagner, C. W. Tsao; American Heart Association Council on Epidemiology and Prevention Statistics Committee and Stroke Statistics Subcommittee, Heart disease and stroke statistics—2020 update: A report from the American Heart Association. *Circulation* **141**, CIR000000000000000757 (2020).
3. National Institute of Neurological Disorders and Stroke rt-PA Stroke Study Group, Tissue plasminogen activator for acute ischemic stroke. *N. Eng. J. Med.* **333**, 1581–1588 (1995).
4. R. G. Nogueira, A. P. Jadhav, D. C. Haussen, A. Bonafe, R. F. Budzik, P. Bhuva, D. R. Yavagal, M. Ribo, C. Cognard, R. A. Hanel, C. A. Sila, A. E. Hassan, M. Millan, E. I. Levy, P. Mitchell, M. Chen, J. D. English, Q. A. Shah, F. L. Silver, V. M. Pereira, B. P. Mehta, B. W. Baxter, M. G. Abraham, P. Cardona, E. Veznedaroglu, F. R. Hellinger, L. Feng, J. F. Kirmani, D. K. Lopes, B. T. Jankowitz, M. R. Frankel, V. Costalat, N. A. Vora, A. J. Yoo, A. M. Malik, A. J. Furlan, M. Rubiera, A. Aghaebrahim, J.M. Olivot, W. G. Tekle, R. Shields, T. Graves, R. J. Lewis, W. S. Smith, D. S. Liebeskind, J. L. Saver, T. G. Jovin, Thrombectomy 6 to 24 hours after stroke with a mismatch between deficit and infarct. *N. Eng. J. Med.* **378**, 11–21 (2018).
5. W. Hacke, M. Kaste, E. Bluhmki, M. Brozman, A. Dávalos, D. Guidetti, V. Larrue, K. R. Lees, Z. Medeghri, T. Machnig, D. Schneider, Rüdiger von Kummer, N. Wahlgren, D. Toni; ECASS Investigators, Thrombolysis with alteplase 3 to 4.5 hours after acute ischemic stroke. *N. Eng. J. Med.* **359**, 1317–1329 (2008).
6. M. Krause, T. G. Phan, C. G. Sobey, H. Ma, R. Lim, Cell-based therapies for stroke: Are we there yet? *Front. Neurol.* **10**, 656 (2019).
7. L. Fletcher, S. Kohli, S. M. Sprague, R. A. Scranton, S. A. Lipton, A. Parra, D. F. Jimenez, M. Digicaylioglu, Intranasal delivery of erythropoietin plus insulin-like growth factor–I for acute neuroprotection in stroke. *J. Neurosurg.* **111**, 164–170 (2009).

8. J. Silver, J. H. Miller, Regeneration beyond the glial scar. *Nat. Rev. Neurosci.* **5**, 146–156 (2004).
9. L.-R. Zhao, A. Willing, Enhancing endogenous capacity to repair a stroke-damaged brain: An evolving field for stroke research. *Prog. Neurobiol.* **163-164**, 5–26 (2018).
10. P. R. Thored, J. Wood, A. Arvidsson, J. Cammenga, Z. Kokaia, O. Lindvall, Long-term neuroblast migration along blood vessels in an area with transient angiogenesis and increased vascularization after stroke. *Stroke* **38**, 3032–3039 (2007).
11. R. Tamarat, J. S. Silvestre, S. le Ricousse-Roussanne, V. Barateau, L. Lecomte-Raclet, M. Clergue, M. Duriez, G. Tobelem, B. I. Lévy, Impairment in ischemia-induced neovascularization in diabetes: Bone marrow mononuclear cell dysfunction and therapeutic potential of placenta growth factor treatment. *Am. J. Pathol.* **164**, 457–466 (2004).
12. M. Rodrigues, V. W. Wong, R. C. Rennert, C. R. Davis, M. T. Longaker, G. C. Gurtner, Progenitor cell dysfunctions underlie some diabetic complications. *Am. J. Pathol.* **185**, 2607–2618 (2015).
13. A. S. Lee, C. Tang, M. S. Rao, I. L. Weissman, J. C. Wu, Tumorigenicity as a clinical hurdle for pluripotent stem cell therapies. *Nat. Med.* **19**, 998–1004 (2013).
14. T. Vierbuchen, M. Wernig, Direct lineage conversions: Unnatural but useful? *Nat. Biotechnol.* **29**, 892–907 (2011).
15. H. Okano, M. Nakamura, K. Yoshida, Y. Okada, O. Tsuji, S. Nori, E. Ikeda, S. Yamanaka, K. Miura, Steps toward safe cell therapy using induced pluripotent stem cells. *Circ. Res.* **112**, 523–533 (2013).
16. A. J. Mellott, M. L. Forrest, M. S. Detamore, Physical non-viral gene delivery methods for tissue engineering. *Ann. Biomed. Eng.* **41**, 446–468 (2013).
17. P. E. Boukany, A. Morss, W.C. Liao, B. Henslee, H.C. Jung, X. Zhang, B. Yu, X. Wang, Y. Wu, L. Li, K. Gao, X. Hu, X. Zhao, O. Hemminger, W. Lu, G. P. Lafyatis, L. J. Lee, Nanochannel electroporation delivers precise amounts of biomolecules into living cells. *Nat. Nanotechnol.* **6**, 747–754 (2011).
18. D. Gallego-Perez, J. J. Otero, C. Czeisler, J. Ma, C. Ortiz, P. Gygli, F. P. Catacutan, H.N. Gokozan, A. Cowgill, T. Sherwood, S. Ghatak, V. Malkoc, X. Zhao, W. C. Liao, S. Gnyawali, X. Wang, A. F. Adler, K. Leong, B. Wulff, T.A. Wilgus, C. Askwith, S. Khanna, C. Rink, C.K. Sen, L. J. Lee, Deterministic transfection drives efficient nonviral reprogramming and uncovers reprogramming barriers. *Nanomedicine* **12**, 399–409 (2016).

19. D. Gallego-Perez, D. Pal, S. Ghatak, V. Malkoc, N. Higueta-Castro, S. Gnyawali, L. Chang, W.C. Liao, J. Shi, M. Sinha, K. Singh, E. Steen, A. Sunycz, R. Stewart, J. Moore, T. Ziebro, R. G. Northcutt, M. Homsy, P. Bertani, W. Lu, S. Roy, S. Khanna, C. Rink, V. B. Sundaresan, J. J. Otero, L. J. Lee, C. K. Sen, Topical tissue nano-transfection mediates non-viral stroma reprogramming and rescue. *Nat. Nanotechnol.* **12**, 974–979 (2017).
20. S. Lee, T. A. Vuong, X. Wen, H. J. Jeong, H. K. So, I. Kwon, J. S. Kang, H. Cho, Methylation determines the extracellular calcium sensitivity of the leak channel NALCN in hippocampal dentate granule cells. *Exp. Mol. Med.* **51**, 1–14 (2019).
21. B. H. Dobkin, S. T. Carmichael, The specific requirements of neural repair trials for stroke. *Neurorehabil. Neural Repair* **30**, 470–478 (2016).
22. C. Iadecola, J. Anrather, The immunology of stroke: From mechanisms to translation. *Nat. Med.* **17**, 796–808 (2011).
23. N. G. Ordóñez, Immunohistochemical endothelial markers: A review. *Adv Anat Pathol* **19**, 281–295 (2012).
24. E. A. Salegio, H. Streeter, N. Dube, P. Hadaczek, L. Samaranch, A. P. Kells, W. S. Sebastian, Y. Zhai, J. Bringas, T. Xu, J. Forsayeth, K. S. Bankiewicz, Distribution of nanoparticles throughout the cerebral cortex of rodents and non-human primates: Implications for gene and drug therapy. *Front. Neuroanat.* **8**, 9 (2014).
25. B. Sweetman, A. A. Linninger, Cerebrospinal fluid flow dynamics in the central nervous system. *Ann. Biomed. Eng.* **39**, 484–496 (2011).
26. X. K. Zhang, D. K. Watson, The FLI-1 transcription factor is a short-lived phosphoprotein in T cells. *J. Biochem.* **137**, 297–302 (2005).
27. I. Loubinoux, A. Volk, J. Borredon, S. Guirimand, B. Tiffon, J. Seylaz, P. Méric, Spreading of vasogenic edema and cytotoxic edema assessed by quantitative diffusion and T2 magnetic resonance imaging. *Stroke* **28**, 419–427 (1997).
28. A.-C. Jönsson, I. Lindgren, B. Norrving, A. Lindgren, Weight loss after stroke: A population-based study from the Lund Stroke Register. *Stroke* **39**, 918–923 (2008).
29. S. D. Bouziana, K. Tziomalos, Malnutrition in patients with acute stroke. *J. Nutrit. Metab.* **2011**, 1–7 (2011).

30. A. Datta, D. Sarmah, L. Mounica, H. Kaur, R. Kesharwani, G. Verma, P. Veeresh, V. Kotian, K. Kalia, A. Borah, X. Wang, K. R. Dave, D. R. Yavagal, P. Bhattacharya, Cell death pathways in ischemic stroke and targeted pharmacotherapy. *Transl. Stroke Res.* **11**, 1185–1202 (2020).
31. N. R. Sims, W. P. Yew, Reactive astrogliosis in stroke: Contributions of astrocytes to recovery of neurological function. *Neurochem. Int.* **107**, 88–103 (2017).
32. L. Huang, Z. B. Wu, Q. ZhuGe, W. M. Zheng, B. Shao, B. Wang, F. Sun, K. Jin, Glial scar formation occurs in the human brain after ischemic stroke. *Int. J. Med. Sci.* **11**, 344–348 (2014).
33. M. Nedergaard, U. Dirnagl, Role of glial cells in cerebral ischemia. *Glia* **50**, 281–286 (2005).
34. G. Nys, M. J. E. van Zandvoort, P. L. M. de Kort, H. B. van der Worp, B. P. W. Jansen, A. Algra, E. H. F. de Haan, L. J. Kappelle, The prognostic value of domain-specific cognitive abilities in acute first-ever stroke. *Neurology* **64**, 821–827 (2005).
35. P. M. Pedersen, H. S. Jørgensen, H. Nakayama, H. O. Raaschou, T. S. Olsen, Hemineglect in acute stroke-incidence and prognostic implications: The Copenhagen Stroke Study1. *Am. J. Phys. Med. Rehabil.* **76**, 122–127 (1997).
36. J. Ringman, J. Saver, R. Woolson, W. Clarke, H. Adams, Frequency, risk factors, anatomy, and course of unilateral neglect in an acute stroke cohort. *Neurology* **63**, 468–474 (2004).
37. G. Gainotti, Les manifestations de negligence et d'inattention pour l'hemisphere. *Cortex* **4**, 64–91 (1968).
38. L. Pizzamiglio, C. Bergego, P. Halligan, V. Homberg, I. Robertson, E. Weber, B. Wilson, P. Zoccolotti, G. Deloche, Factors affecting the clinical measurement of visuo-spatial neglect. *Behav. Neurol.* **5**, 233–240 (1992).
39. K. L. Schaar, M. M. Breneman, S. I. Savitz, Functional assessments in the rodent stroke model. *Exp. Transl. Stroke Med.* **2**, 13 (2010).
40. T. Schallert, D. Adkins, *Primer on Cerebrovascular Diseases* (Elsevier, 2017), pp. 355–360.
41. Z. Fei, Y. Wu, S. Sharma, D. Gallego-Perez, N. Higuera-Castro, D. Hansford, J. J. Lannutti, L. J. Lee, Gene delivery to cultured embryonic stem cells using nanofiber-based sandwich electroporation. *Anal. Chem.* **85**, 1401–1407 (2013).
42. Y. Wu, M. C. Terp, K. J. Kwak, D. Gallego-Perez, S. P. Nana-Sinkam, L. J. Lee, Surface-mediated nucleic acid delivery by lipoplexes prepared in microwell arrays. *Small* **9**, 2358–2367 (2013).

43. N. Higueta-Castro, D. Gallego-Perez, K. Love, M. R. Sands, G. Kaletunç, D. J. Hansford, Soft lithography-based fabrication of biopolymer microparticles for nutrient microencapsulation. *Indust. Biotechnol.* **8**, 365–371 (2012).
44. L. Diaz-Starokozheva, D. Das, X. Gu, J. T. Moore, L. R. Lemmerman, I. Valerio, H. M. Powell, N. Higueta-Castro, M. R. Go, A. F. Palmer, D. Gallego-Perez, Early intervention in ischemic tissue with oxygen nanocarriers enables successful implementation of restorative cell therapies. *Cell. Mol. Bioeng.* **13**, 435–446 (2020).
45. J. T. Moore, C. G. Wier, L. R. Lemmerman, L. Ortega-Pineda, D. J. Dodd, W. R. Lawrence, S. Duarte-Sanmiguel, K. Dathathreya, L. Diaz-Starokozheva, H. N. Harris, C. K. Sen, I. L. Valerio, N. Higueta-Castro, W. D. Arnold, S. J. Kolb, D. Gallego-Perez, Nanochannel-based poration drives benign and effective nonviral gene delivery to peripheral nerve tissue. *Adv. Biosyst.* **4**, e2000157 (2020).
46. Y. Jin, J. S. Lee, J. Kim, S. Min, S. Wi, J. H. Yu, G.-E. Chang, A.-N. Cho, Y. Choi, D.-H. Ahn, S.-R. Cho, E. Cheong, Y.G. Kim, H.-P. Kim, Y. Kim, D. S. Kim, H. W. Kim, Z. Quan, H.-C. Kang, S.W. Cho, Three-dimensional brain-like microenvironments facilitate the direct reprogramming of fibroblasts into therapeutic neurons. *Nat. Biomed. Eng.* **2**, 522–539 (2018).
47. S.-J. Chen, C. M. Chang, S. K. Tsai, Y. L. Chang, S. J. Chou, S. S. Huang, L. K. Tai, Y. C. Chen, H. H. Ku, H. Y. Li, S. H. Chiou, Functional improvement of focal cerebral ischemia injury by subdural transplantation of induced pluripotent stem cells with fibrin glue. *Stem Cells Dev.* **19**, 1757–1767 (2010).
48. J. A. Stokum, V. Gerzanich, J. M. Simard, Molecular pathophysiology of cerebral edema. *J. Cereb. Blood Flow Metab.* **36**, 513–538 (2016).
49. A. Marmarou, A review of progress in understanding the pathophysiology and treatment of brain edema. *Neurosurg. Focus* **22**, E1 (2007).
50. I. Arnaoutova, H. K. Kleinman, In vitro angiogenesis: Endothelial cell tube formation on gelled basement membrane extract. *Nat. Protoc.* **5**, 628–635 (2010).
51. M. Königshoff, M. Kramer, N. Balsara, J. Wilhelm, O. V. Amarie, A. Jahn, F. Rose, L. Fink, W. Seeger, L. Schaefer, A. Günther, O. Eickelberg, WNT1-inducible signaling protein–1 mediates pulmonary fibrosis in mice and is upregulated in humans with idiopathic pulmonary fibrosis. *J. Clin. Invest.* **119**, 772–787 (2009).

52. J. Schindelin, I. Arganda-Carreras, E. Frise, V. Kaynig, M. Longair, T. Pietzsch, S. Preibisch, C. Rueden, S. Saalfeld, B. Schmid, J.-Y. Tinevez, D. J. White, V. Hartenstein, K. Eliceiri, P. Tomancak, A. Cardona, Fiji: an open-source platform for biological-image analysis. *Nat. Methods* **9**, 676–682 (2012).
53. S. De Val, B. L. Black, Transcriptional control of endothelial cell development. *Dev. Cell* **16**, 180–195 (2009).
54. J. Giddings, S. Hogg, I. Legg, I. Hughes, The relationship between von Willebrand factor antigen and fibronectin in human plasma, endothelial cells and fibroblasts in culture. *Thromb. Res.* **44**, 291–301 (1986).
